# Supplementary material for: A geospatial database of close-to-reality travel times to obstetric emergency care in 15 Nigerian conurbations
Source: PubMed Central journal article supplement (PMC10593805; doi:10.1038/s41597-023-02651-9), 2023-10-23

## Supplementary file

Macharia et al. A geospatial database of close-to-reality travel times to obstetric emergency care in 15 Nigerian conurbations. Scientific Data. (2023).

### Table of Contents

|                                                                                                                                                                                                          |    |
|----------------------------------------------------------------------------------------------------------------------------------------------------------------------------------------------------------|----|
| Figure S1. The local government area boundaries that defined the urban spatial extents of Aba city in Abia state, Nigeria, with spatial representation of its population distribution. ....              | 2  |
| Figure S2. The local government area boundaries that defined the urban spatial extents of Abuja the Federal Capital Territory, Nigeria, with spatial representation of its population distribution. .... | 3  |
| Figure S3. The local government area boundaries that defined the urban spatial extents of Benin City in Edo state, Nigeria, with spatial representation of its population distribution. ....             | 4  |
| Figure S4. The local government area boundaries that defined the urban spatial extents of Ibadan in Oyo state, Nigeria, with spatial representation of its population distribution. ....                 | 5  |
| Figure S5. The local government area boundaries that defined the urban spatial extents of Ilorin in Kwara state, Nigeria, with spatial representation of its population distribution. ....               | 6  |
| Figure S6. The local government area boundaries that defined the urban spatial extents of Jos in Plateau state, Nigeria, with spatial representation of its population distribution. ....                | 7  |
| Figure S7. The local government area boundaries that defined the urban spatial extents of Kaduna in Kaduna state, Nigeria, with spatial representation of its population distribution. ....              | 8  |
| Figure S8. The local government area boundaries that defined the urban spatial extents of Kano in Kano state, Nigeria, with spatial representation of its population distribution. ....                  | 9  |
| Figure S9. The local government area boundaries that defined the urban spatial extents of Legos in Lagos state, Nigeria, with spatial representation of its population distribution. ....                | 10 |
| Figure S10. The local government area boundaries that defined the urban spatial extents of Maiduguri in Borno state, Nigeria, with spatial representation of its population distribution. ....           | 11 |
| Figure S11. The local government area boundaries that defined the urban spatial extents of Onitsha in Anambra state, Nigeria, with spatial representation of its population distribution. ....           | 12 |
| Figure S12. The local government area boundaries that defined the urban spatial extents of Owerri in Imo state, Nigeria, with spatial representation of its population distribution. ....                | 13 |
| Figure S13. The local government area boundaries that defined the urban spatial extents of Port Harcourt in Rivers state, Nigeria, with spatial representation of its population distribution. ....      | 14 |
| Figure S14. The local government area boundaries that defined the urban spatial extents of Uyo in Akwa-Ibom state, Nigeria, with spatial representation of its population distribution. ....             | 15 |
| Figure S15. The local government area boundaries that defined the urban spatial extents of Warri in Delta state, Nigeria, with spatial representation of its population distribution. ....               | 16 |

**Figure S1.** The local government area boundaries that defined the urban spatial extents of Aba city in Abia state, Nigeria, with spatial representation of its population distribution.

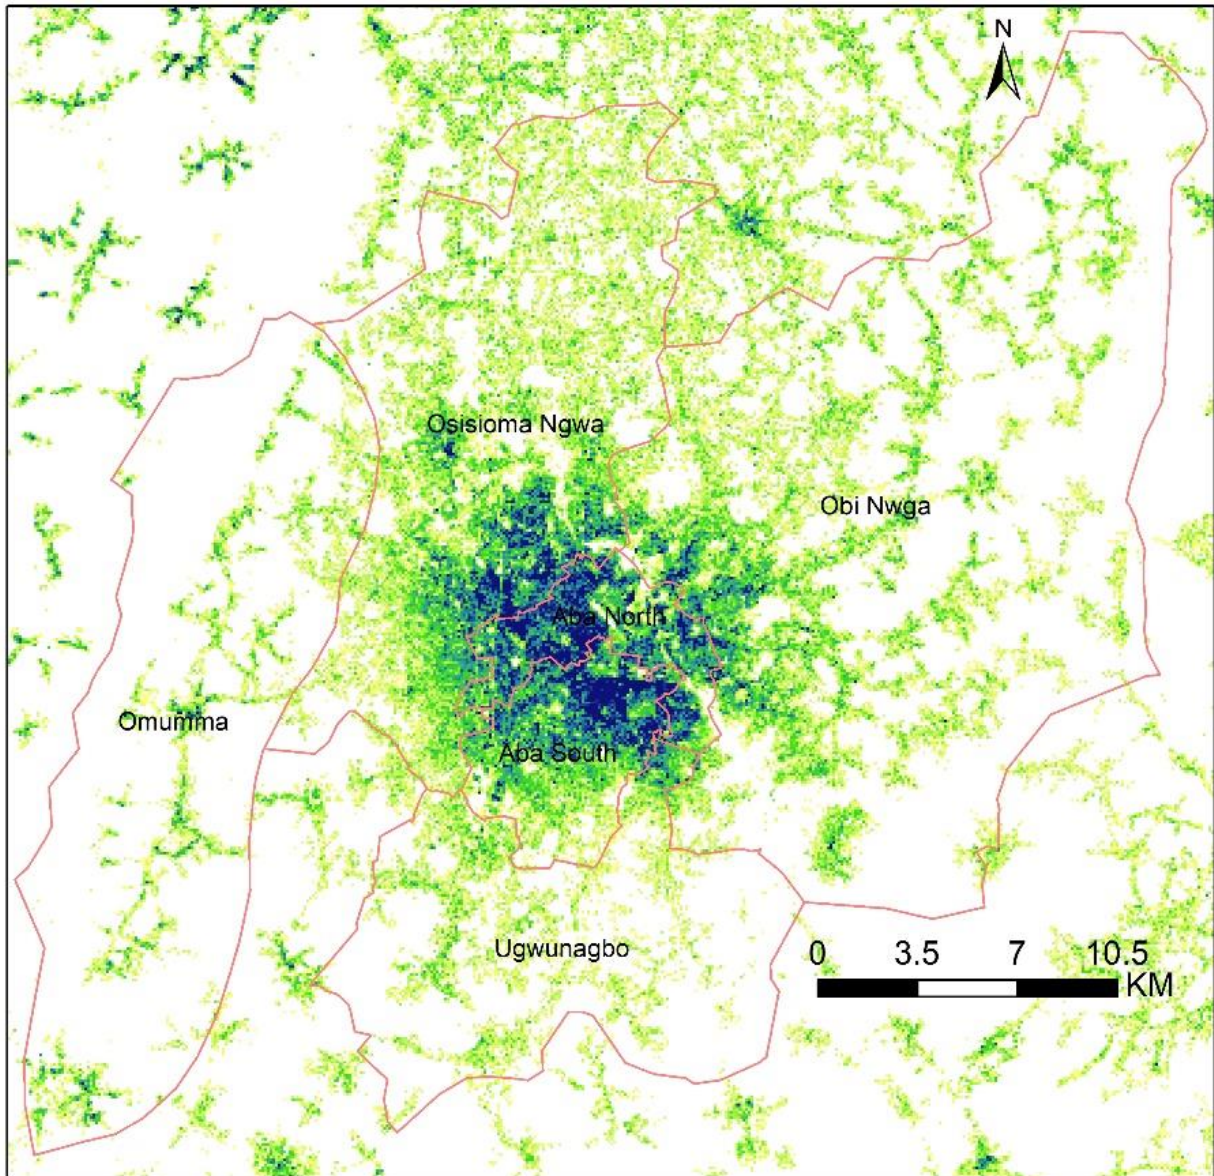

**Figure S2.** The local government area boundaries that defined the urban spatial extents of Abuja the Federal Capital Territory, Nigeria, with spatial representation of its population distribution.

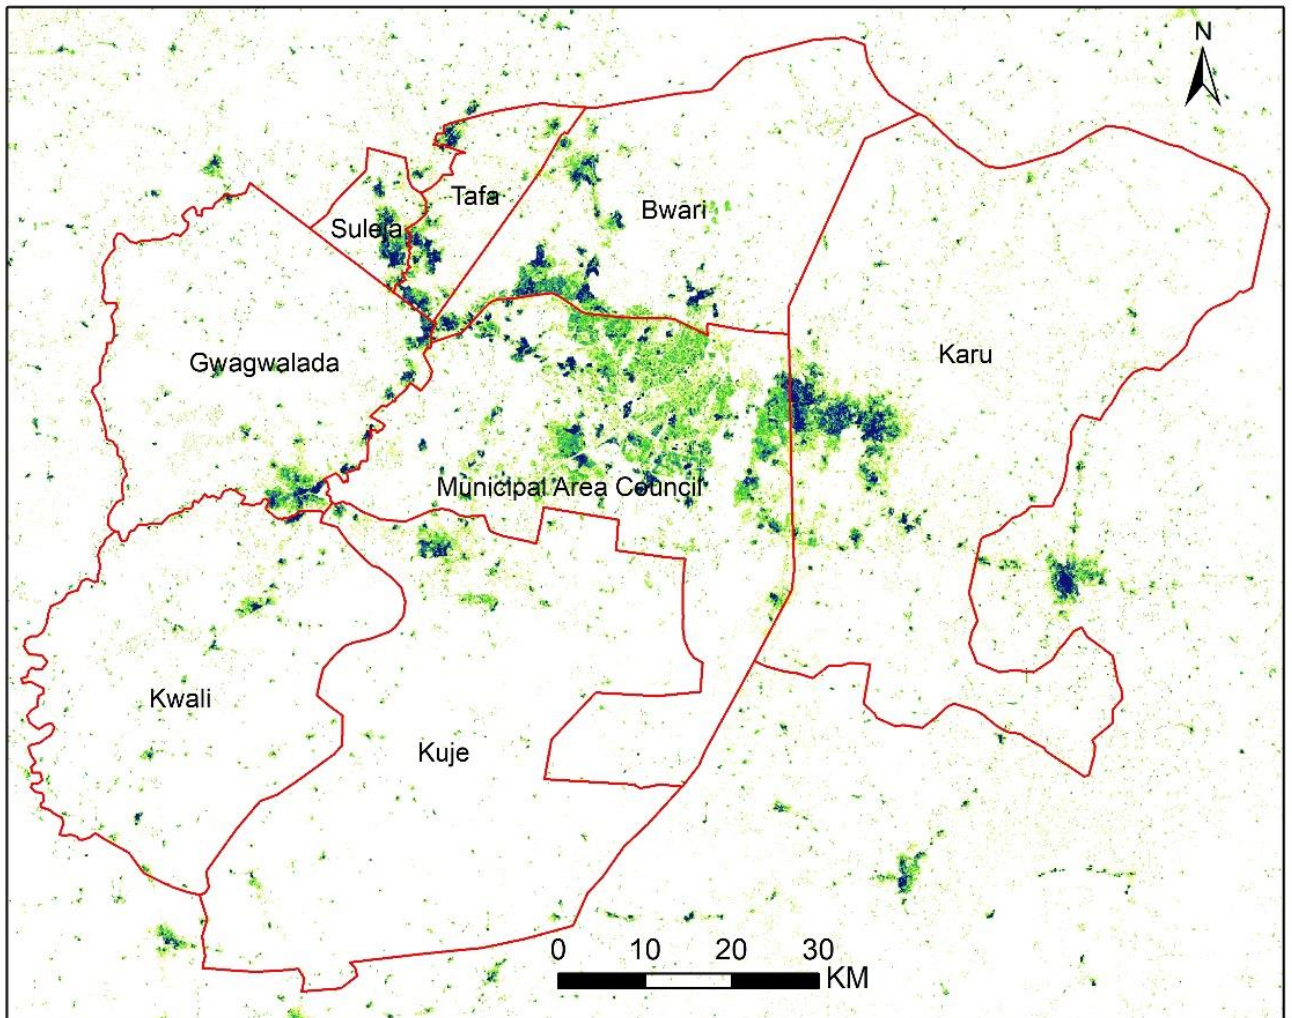

**Figure S3.** The local government area boundaries that defined the urban spatial extents of Benin City in Edo state, Nigeria, with spatial representation of its population distribution.

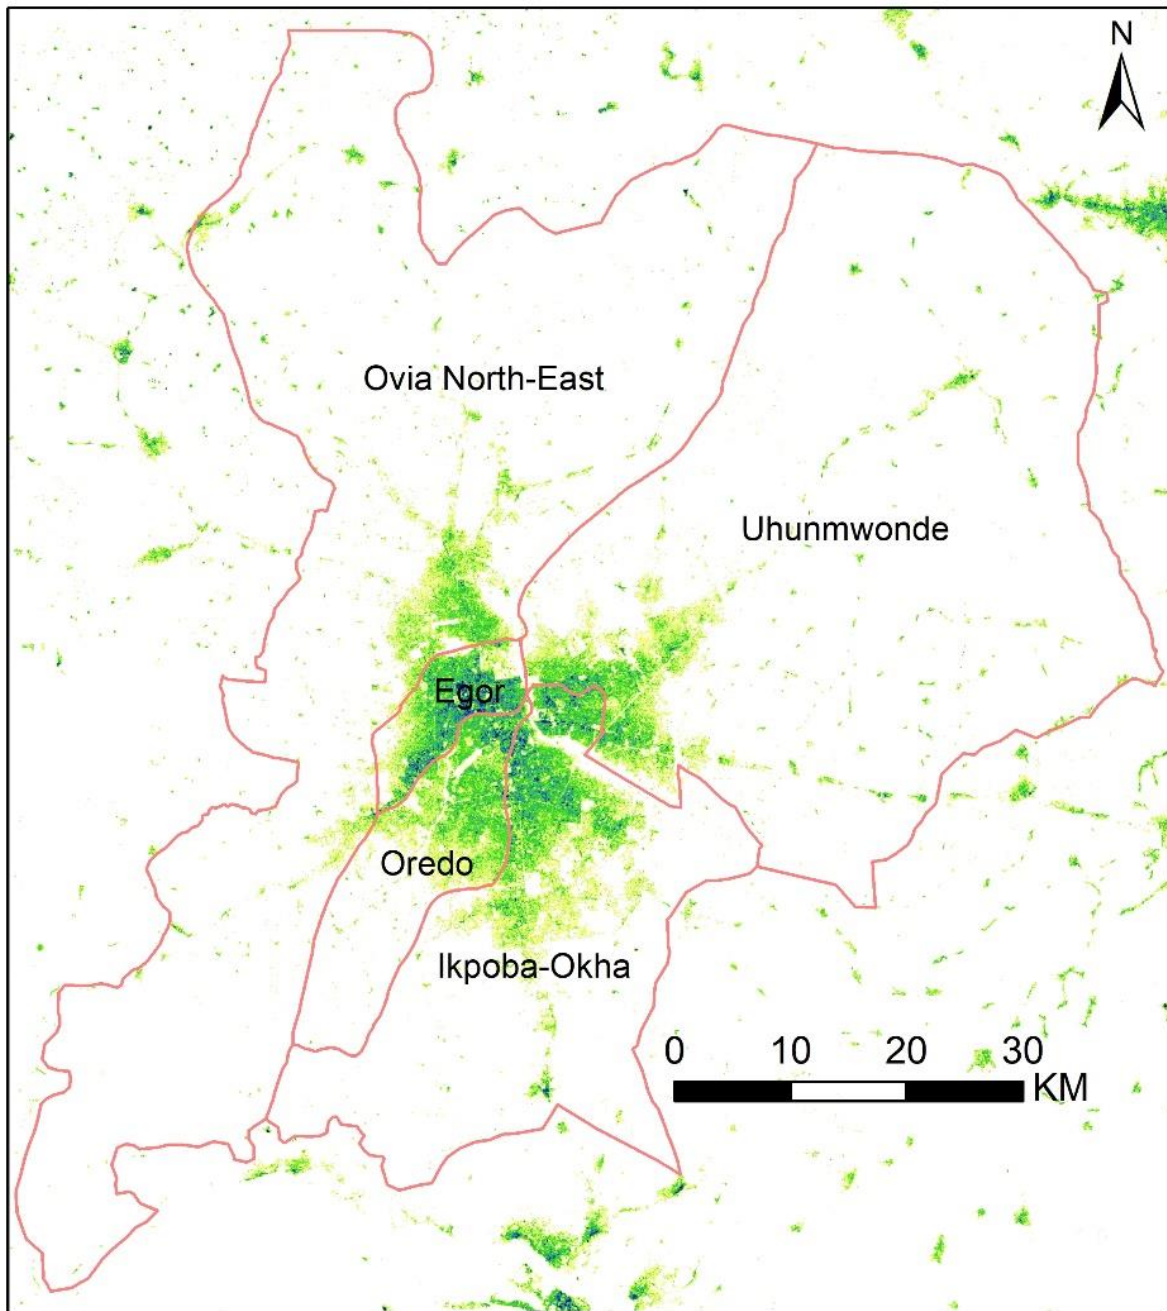

**Figure S4.** The local government area boundaries that defined the urban spatial extents of Ibadan in Oyo state, Nigeria, with spatial representation of its population distribution.

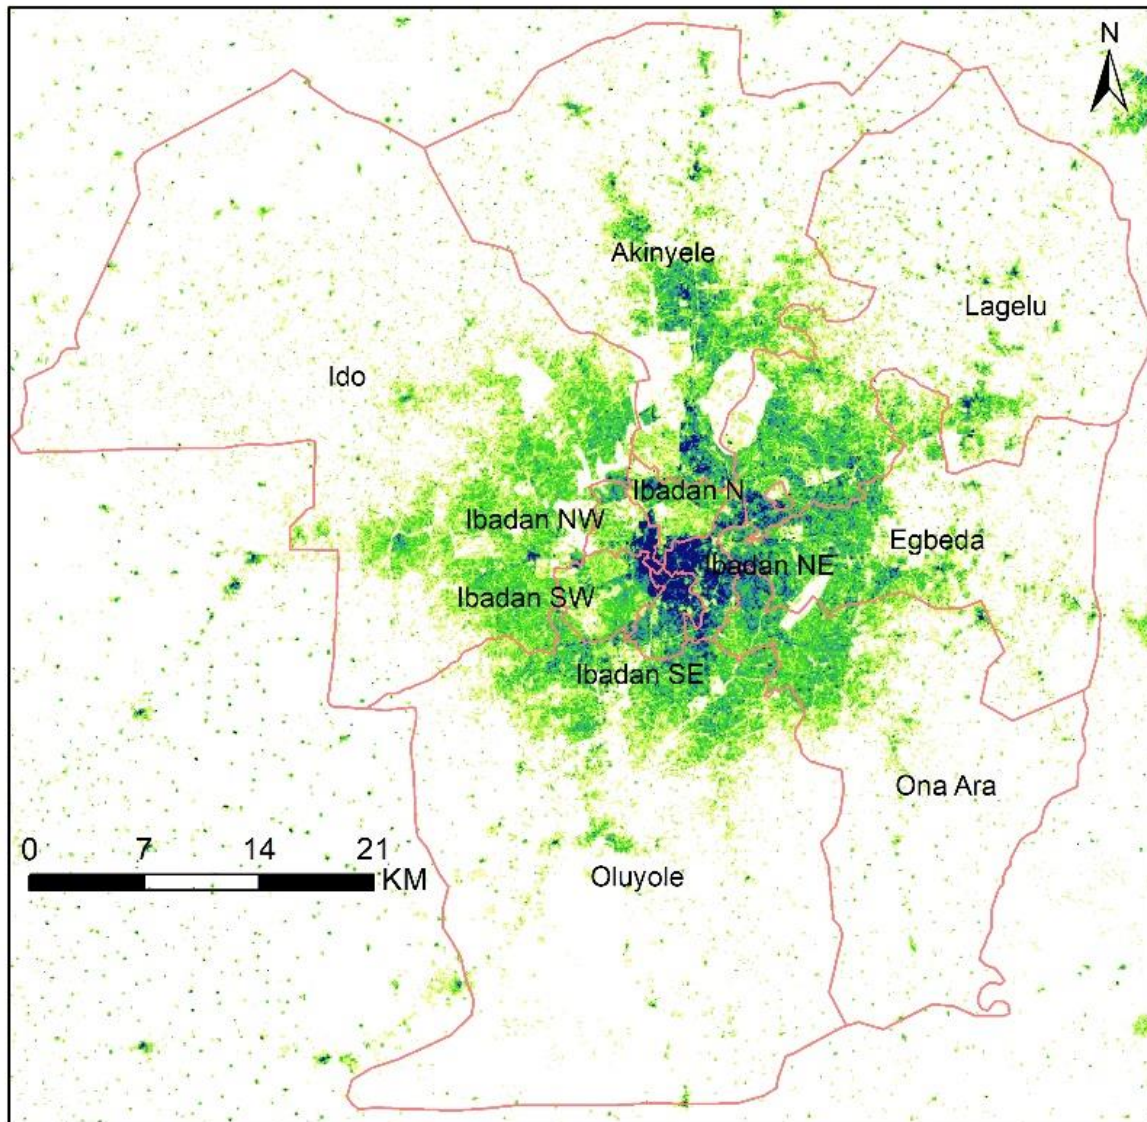

**Figure S5.** The local government area boundaries that defined the urban spatial extents of Ilorin in Kwara state, Nigeria, with spatial representation of its population distribution.

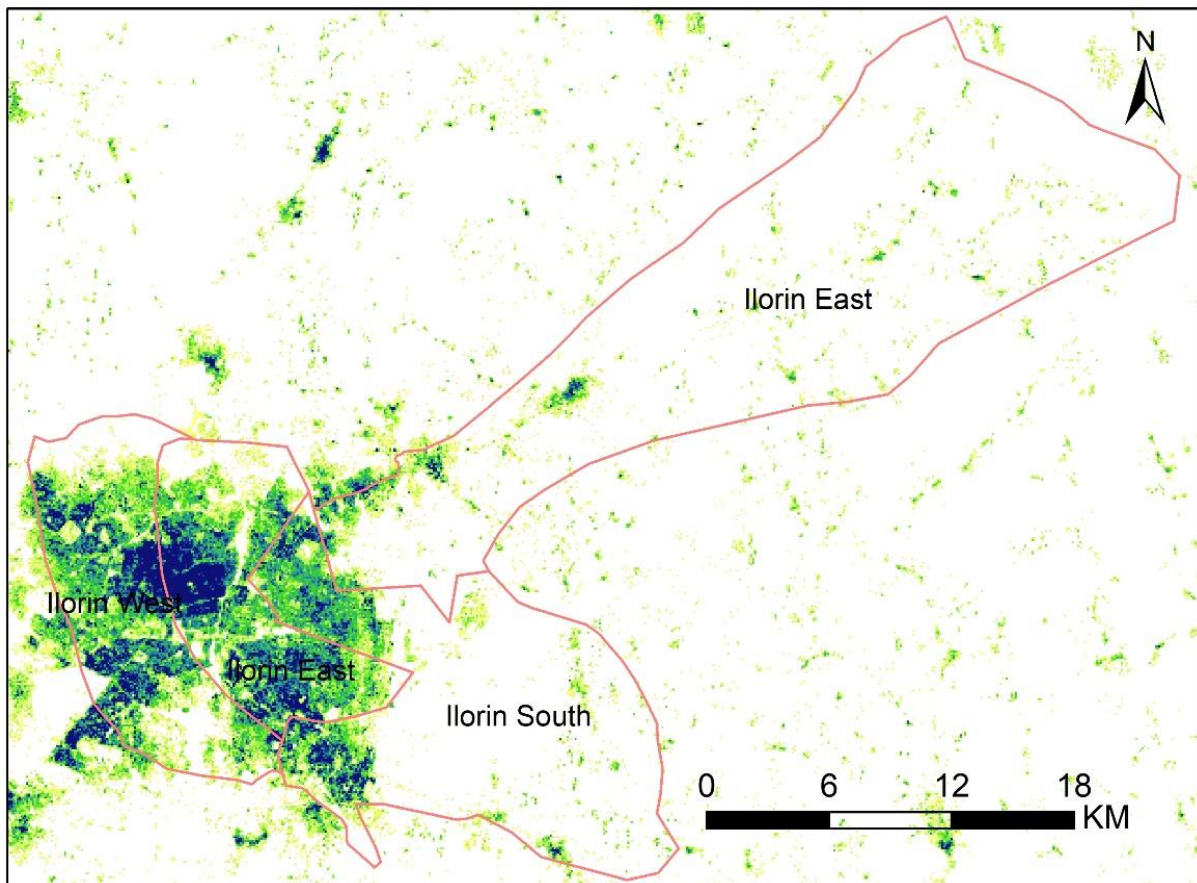

**Figure S6.** The local government area boundaries that defined the urban spatial extents of Jos in Plateau state, Nigeria, with spatial representation of its population distribution.

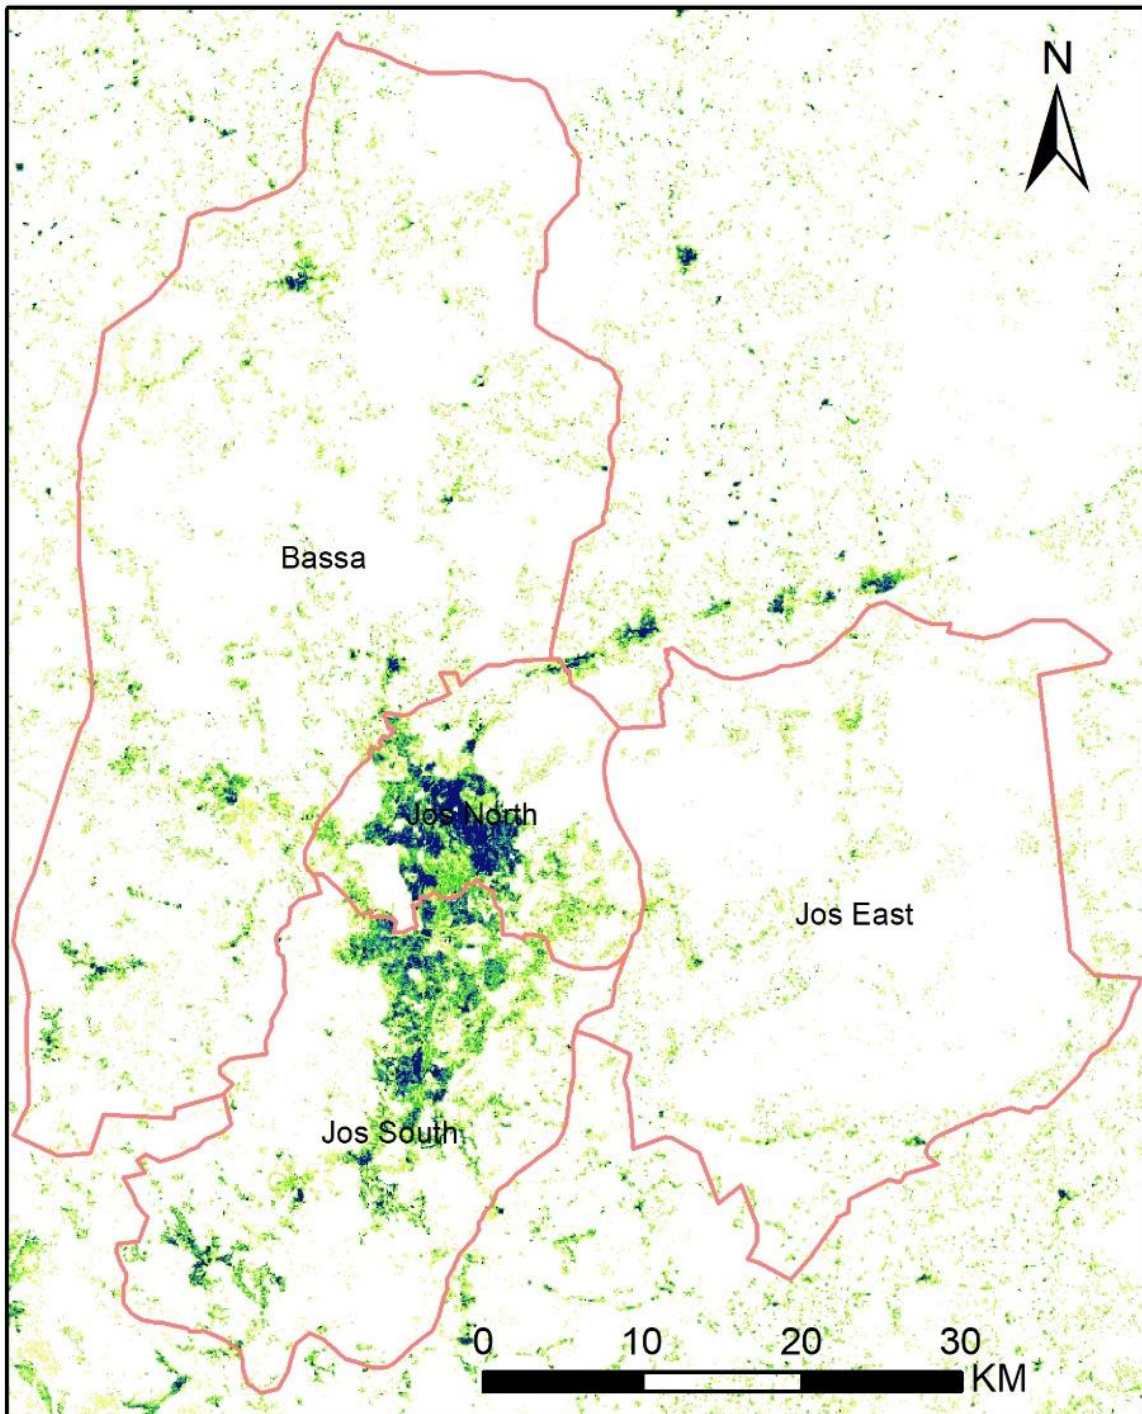

**Figure S7.** The local government area boundaries that defined the urban spatial extents of Kaduna in Kaduna state, Nigeria, with spatial representation of its population distribution.

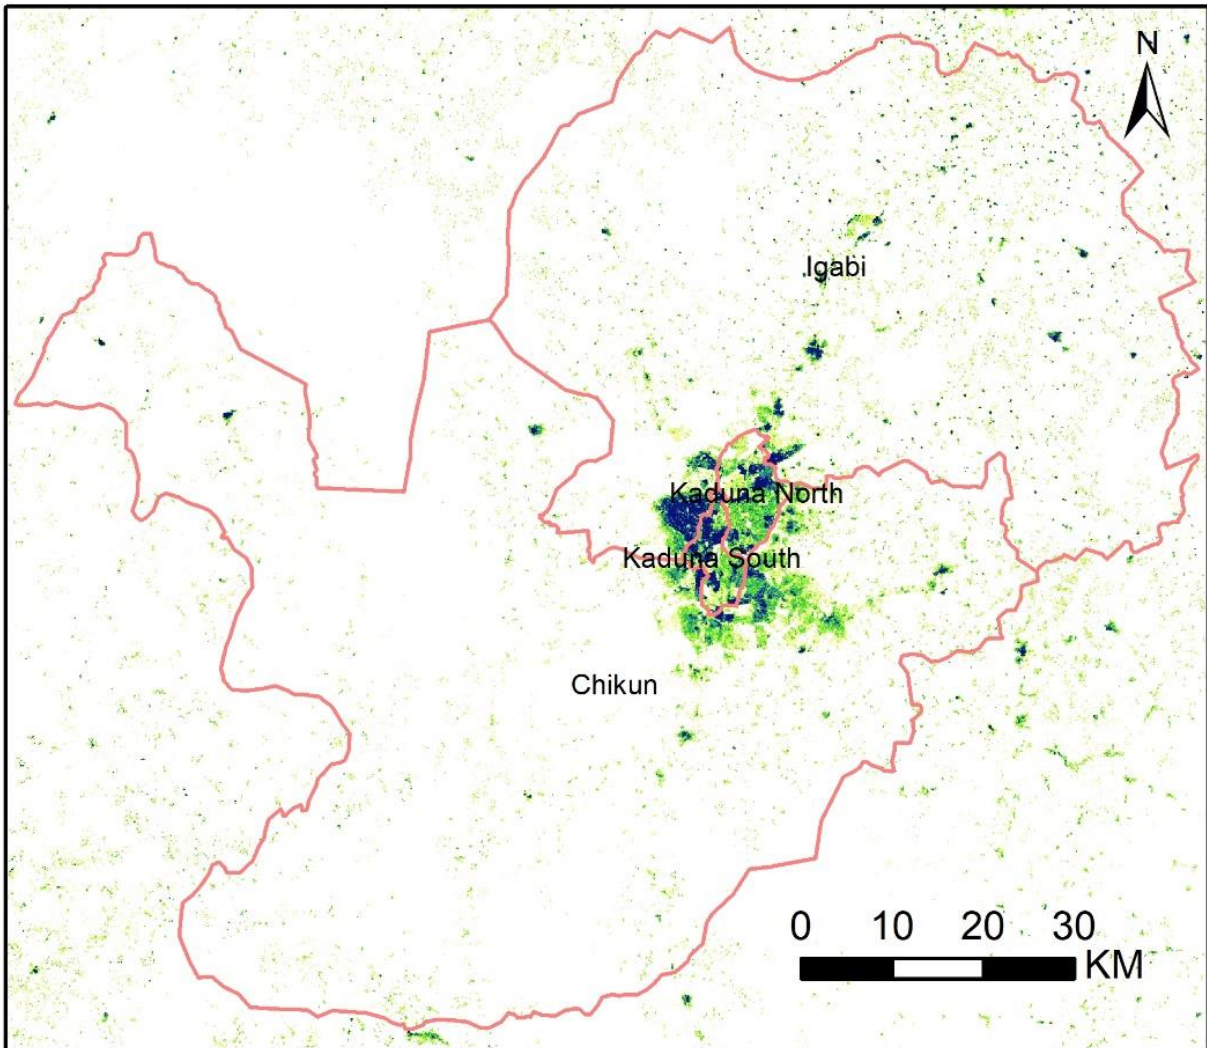



**Figure S8.** The local government area boundaries that defined the urban spatial extents of Kano in Kano state, Nigeria, with spatial representation of its population distribution.

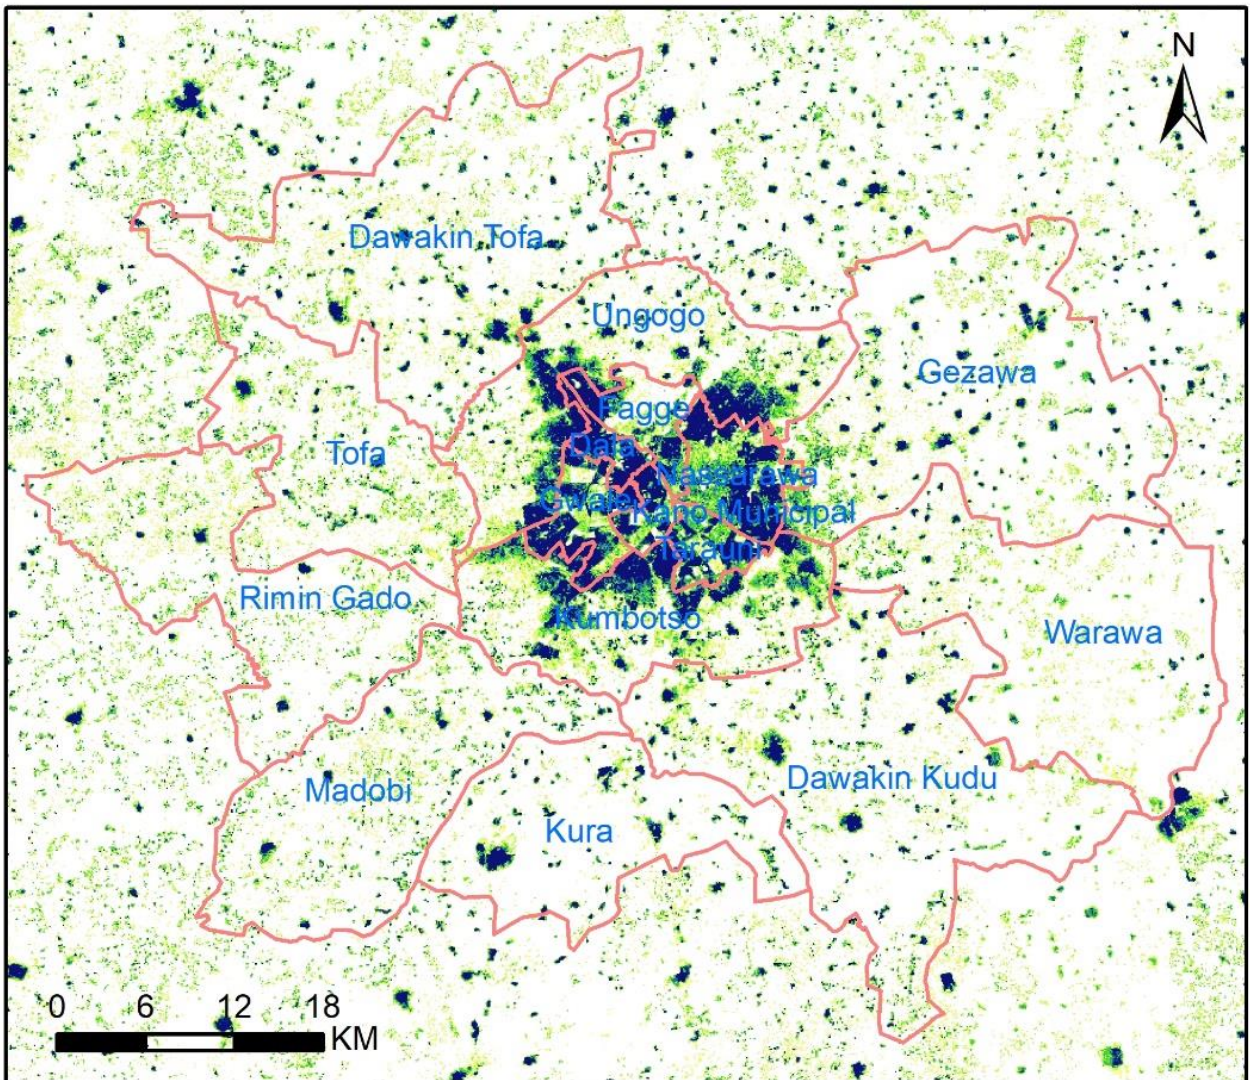

**Figure S9.** The local government area boundaries that defined the urban spatial extents of Legos in Lagos state, Nigeria, with spatial representation of its population distribution.

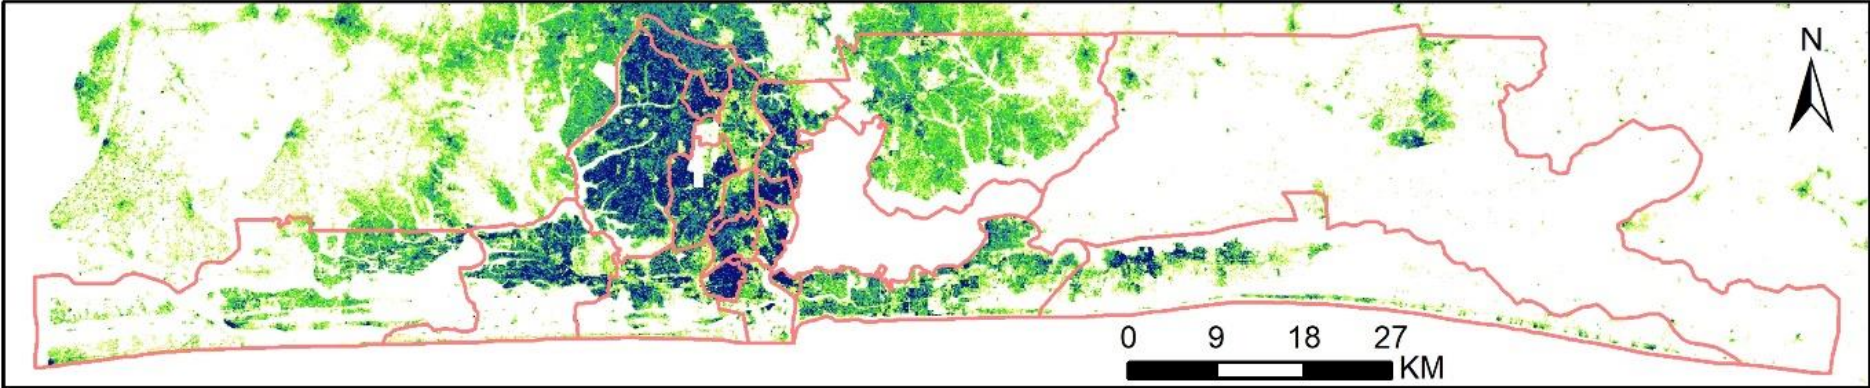

**Figure S10.** The local government area boundaries that defined the urban spatial extents of Maiduguri in Borno state, Nigeria, with spatial representation of its population distribution.

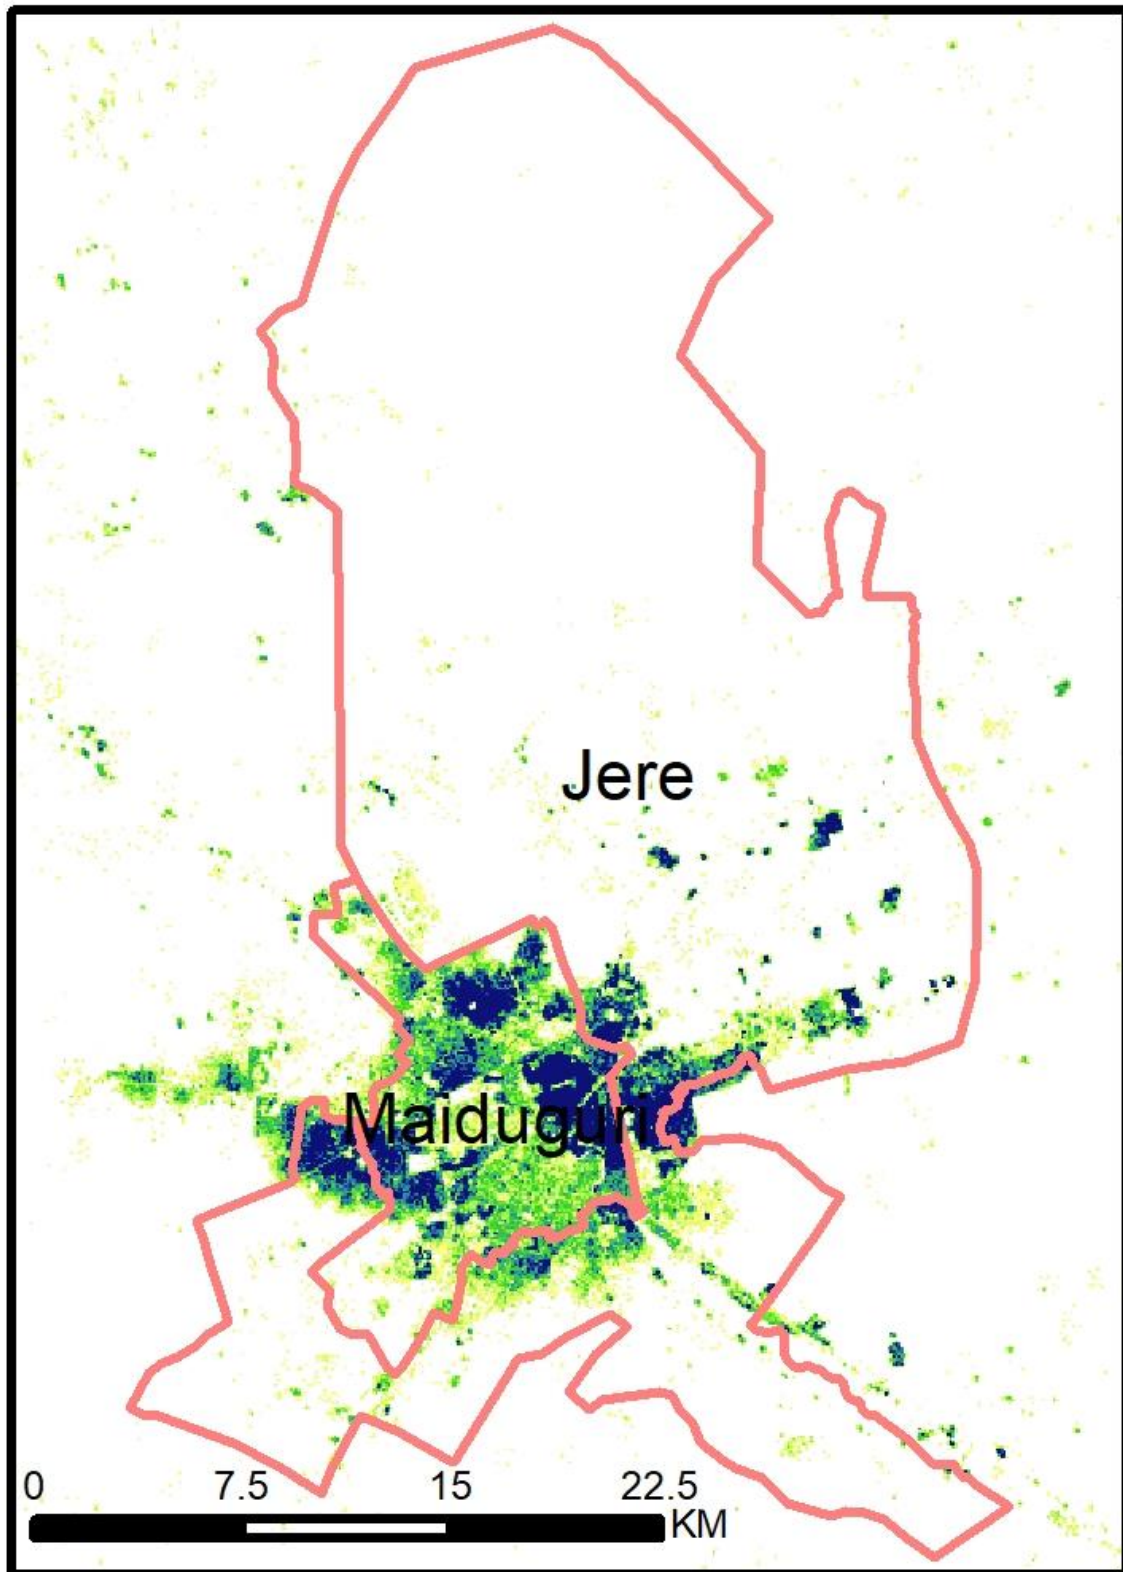

**Figure S11.** The local government area boundaries that defined the urban spatial extents of Onitsha in Anambra state, Nigeria, with spatial representation of its population distribution.

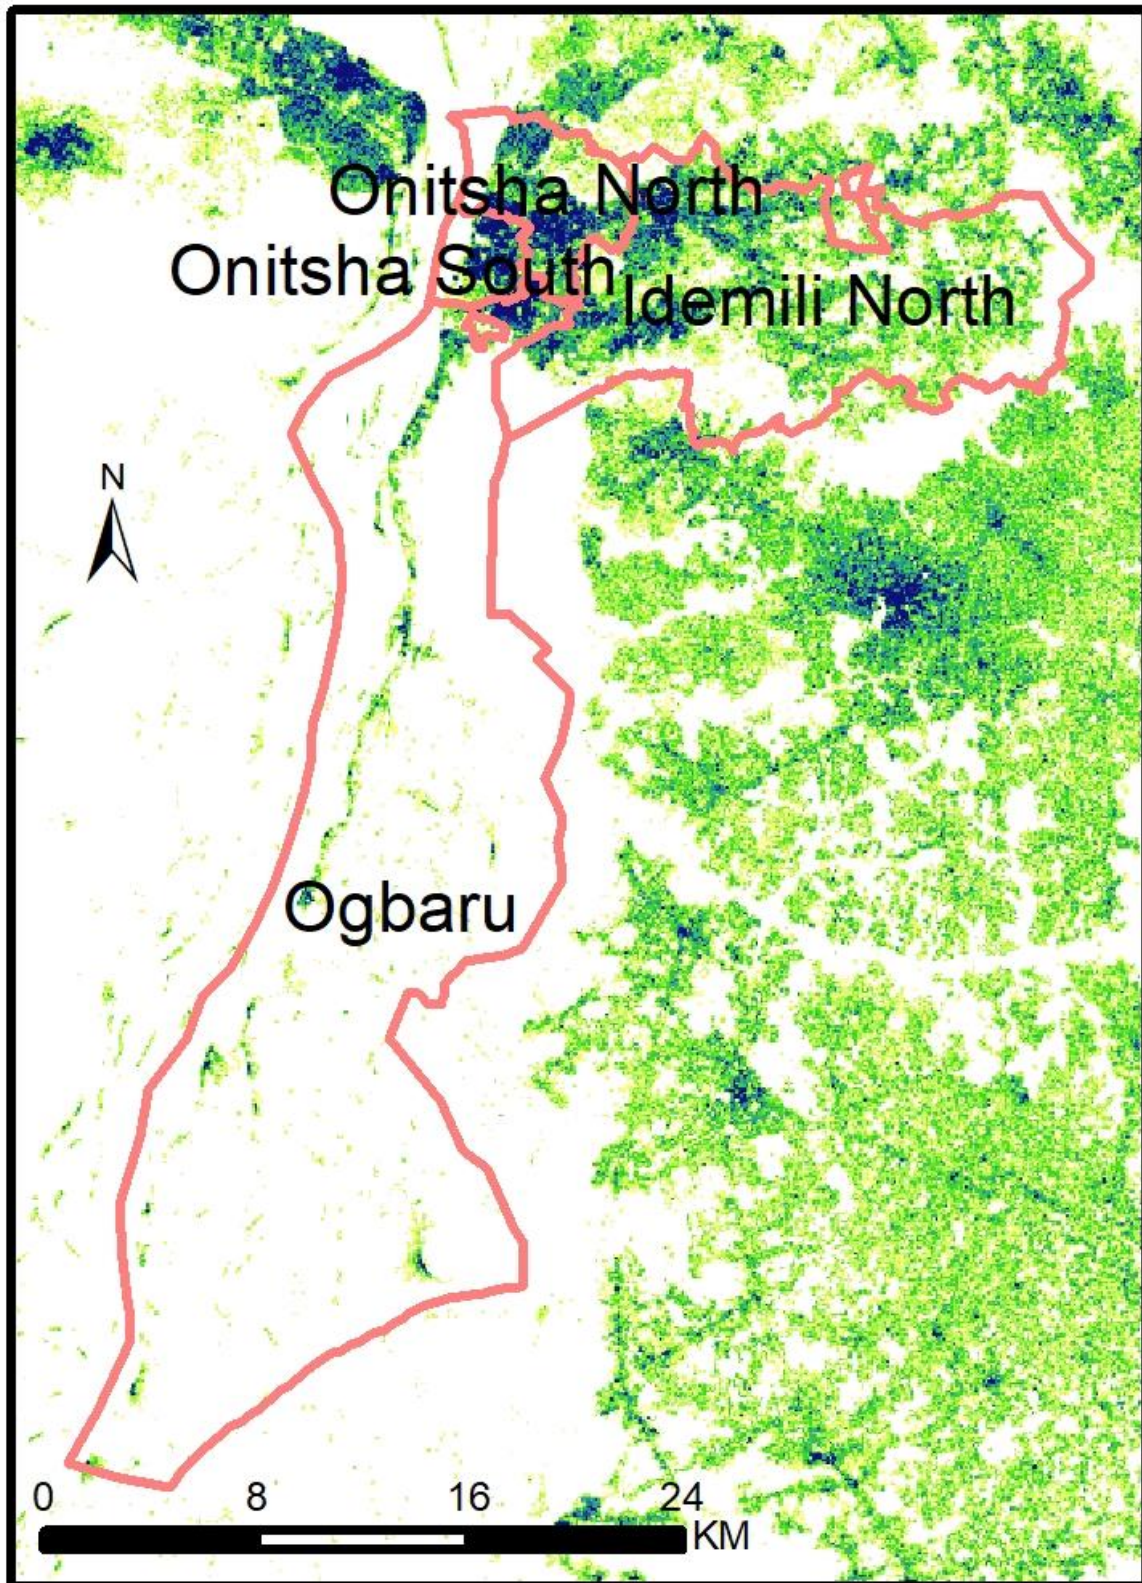

**Figure S12.** The local government area boundaries that defined the urban spatial extents of Owerri in Imo state, Nigeria, with spatial representation of its population distribution.

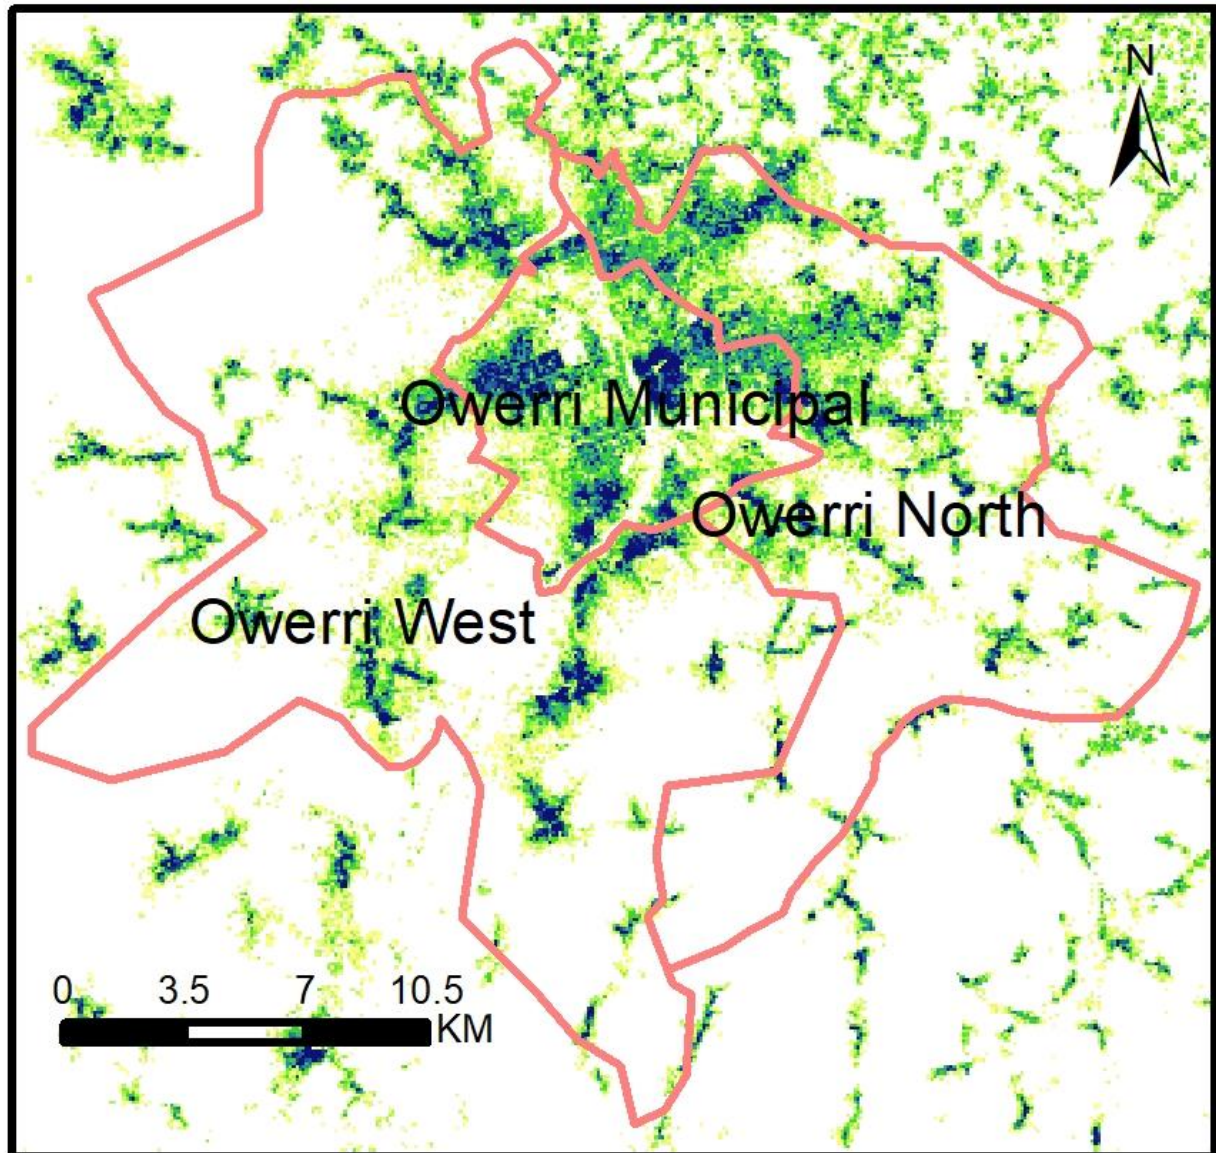

**Figure S13.** The local government area boundaries that defined the urban spatial extents of Port Harcourt in Rivers state, Nigeria, with spatial representation of its population distribution.

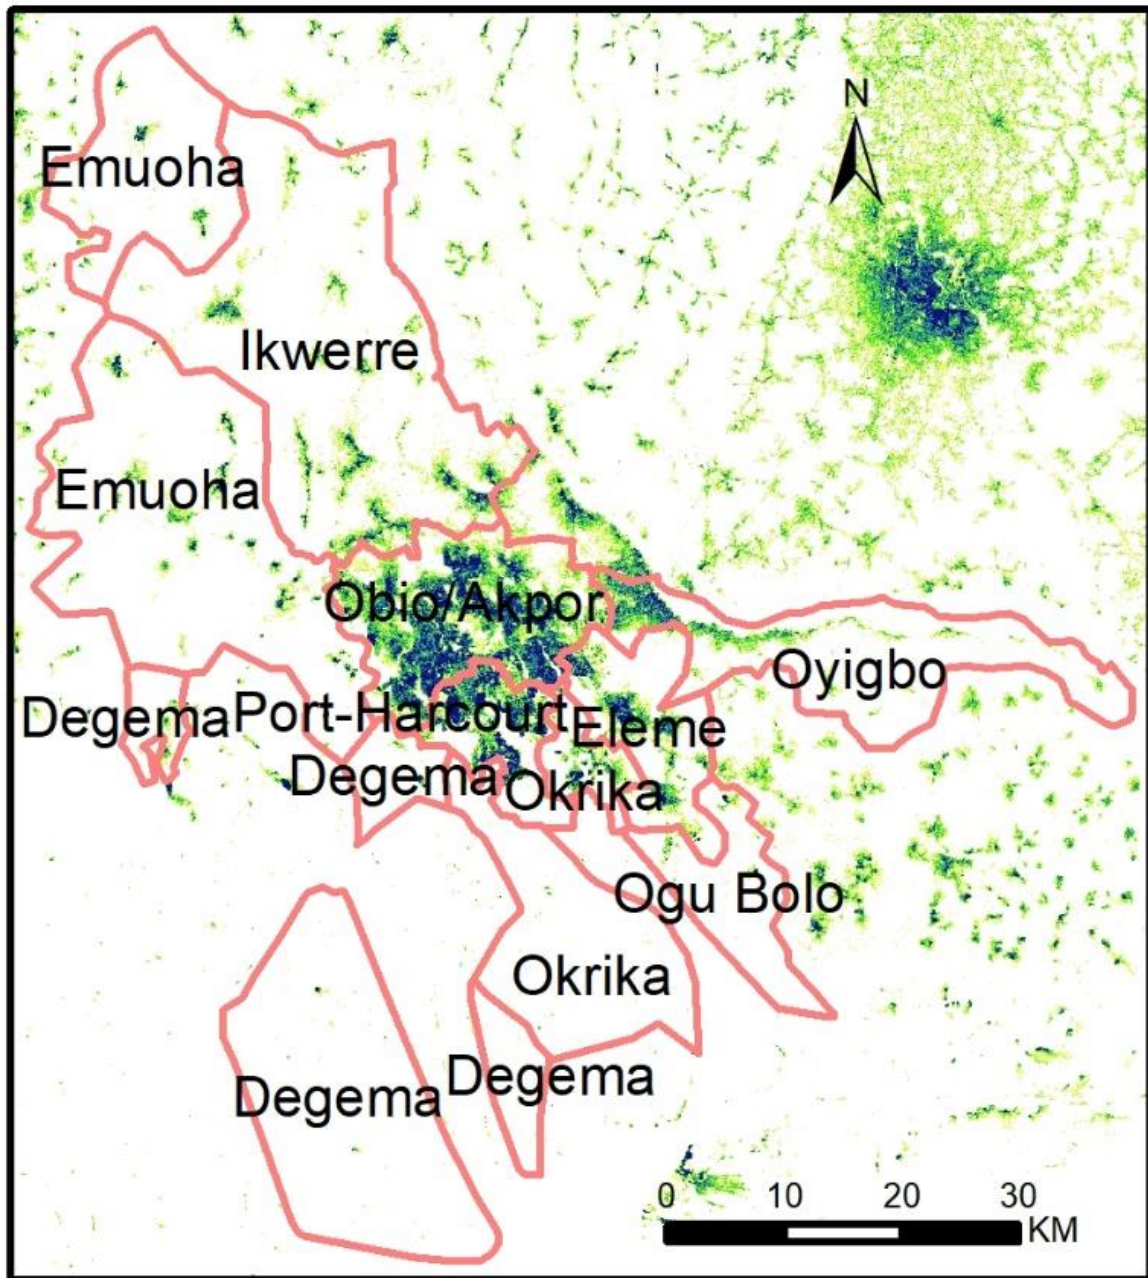

**Figure S14.** The local government area boundaries that defined the urban spatial extents of Uyo in Akwa-Ibom state, Nigeria, with spatial representation of its population distribution.

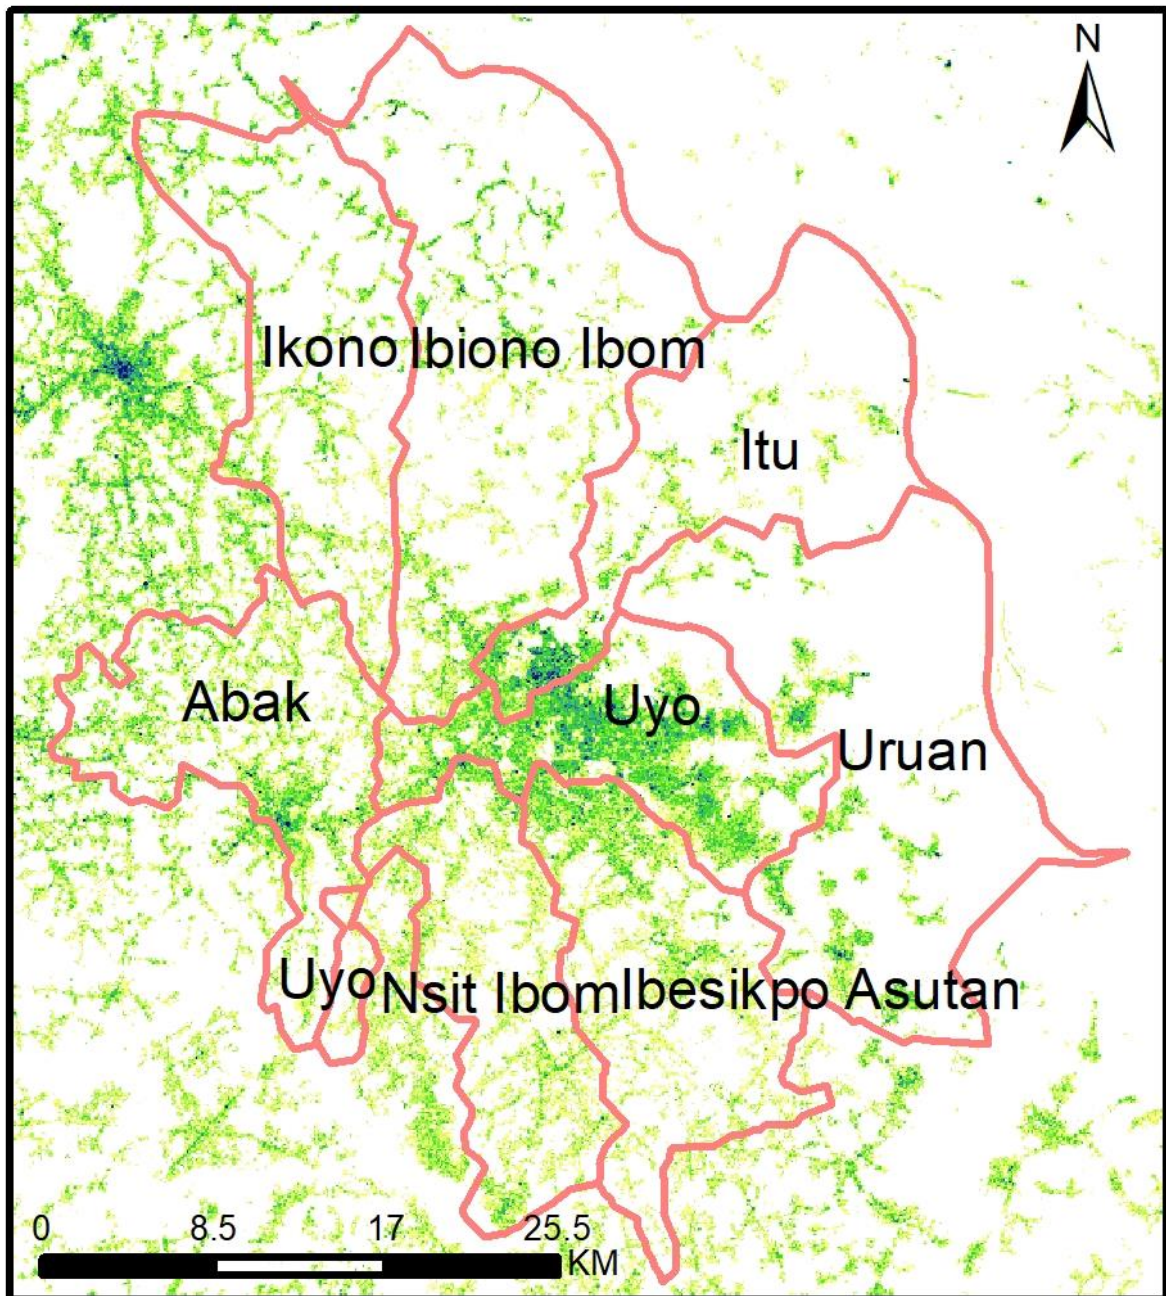

**Figure S15.** The local government area boundaries that defined the urban spatial extents of Warri in Delta state, Nigeria, with spatial representation of its population distribution.

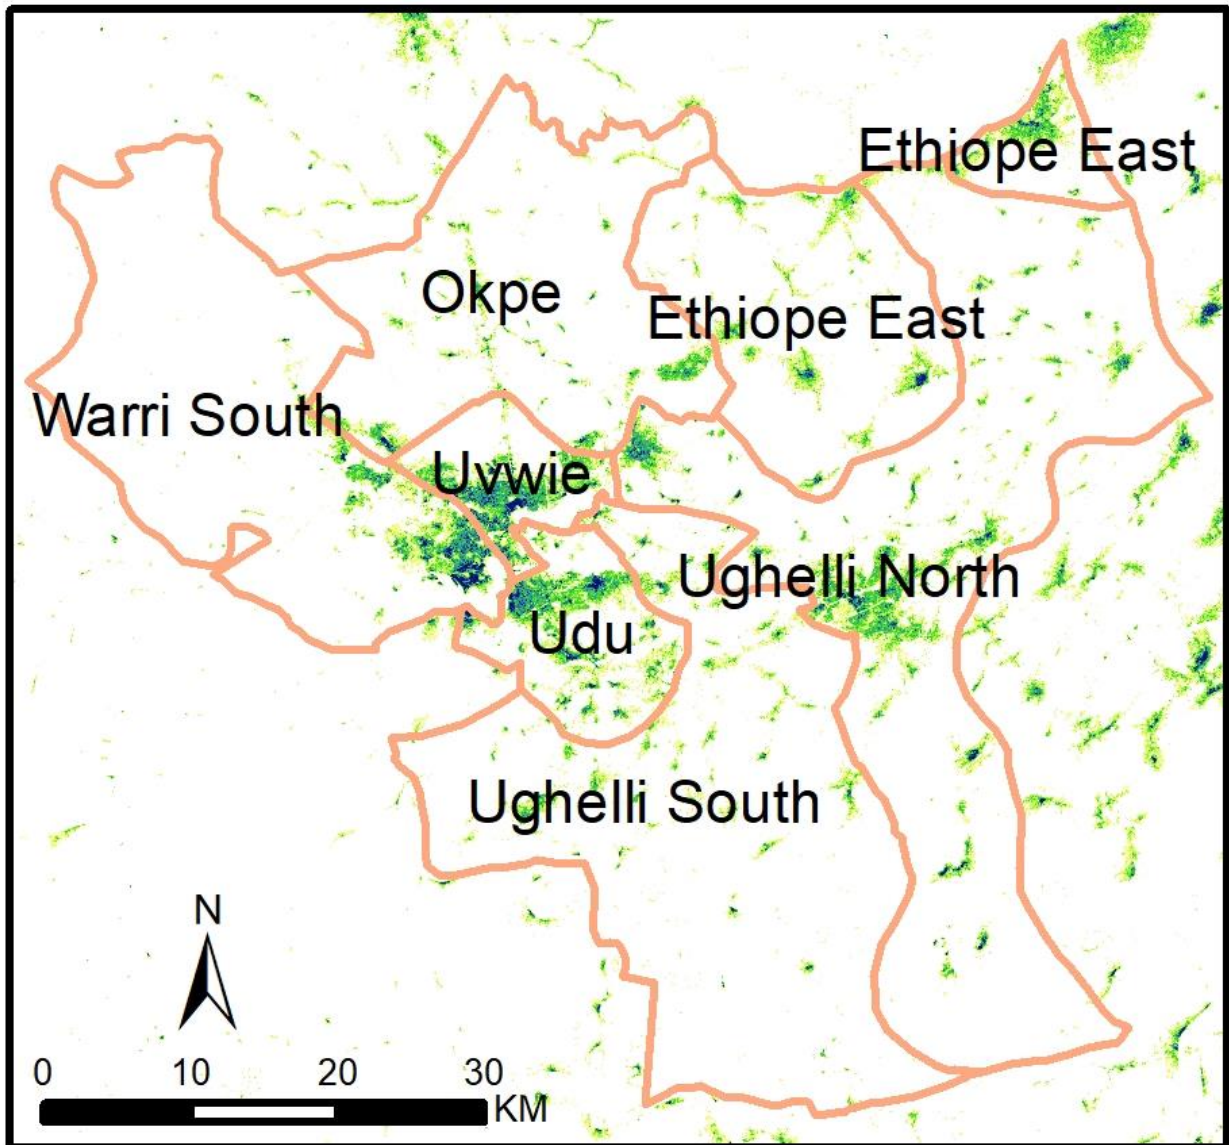

Supplement: 41597_2023_2651_MOESM1_ESM.pdf [file 41597_2023_2651_MOESM1_ESM.pdf]
